# Supplementary material for: Mixed-metal–organic frameworks (M′MOFs) from 1D to 3D based on the “organic” connectivity and the inorganic connectivity: syntheses, structures and magnetic properties
Source: Royal Society of Chemistry journal article supplement (doi:10.1039/c5ce00126a), 2015-01-01
Supplement: c5ce00126a1.pdf [file c5ce00126a1.pdf]

**Mixed-metal-organic frameworks (M'MOFs) from 1D to 3D based  
on the “organic” connectivity with the inorganic connectivity:  
Syntheses, structures and magnetic properties**

**Sheng Zhang,<sup>a</sup> Xiangyu Liu,<sup>a,b</sup> Qi Yang,<sup>a</sup> Qing Wei,<sup>a</sup> Gang Xie,<sup>a</sup> Sanping Chen<sup>\*a</sup>**

*<sup>a</sup>Key Laboratory of Synthetic and Natural Functional Molecule Chemistry of Ministry of Education, College of Chemistry and Materials Science, Northwest University, Xi'an 710127, China*

*<sup>b</sup>School of Chemistry and Chemical Engineering, Ningxia University, Yinchuan 750021, China*

**Corresponding author**

**Dr. Sanping Chen**

**E-mail: [sanpingchen@126.com](mailto:sanpingchen@126.com)**

**Table S1** Crystal data and structure refinement details for **1-10**.

| Compound                          | 1                                                                                 | 2                                                                                                | 3                                                                                                | 4                                                                                | 5                                                                                                |
|-----------------------------------|-----------------------------------------------------------------------------------|--------------------------------------------------------------------------------------------------|--------------------------------------------------------------------------------------------------|----------------------------------------------------------------------------------|--------------------------------------------------------------------------------------------------|
| Empirical formula                 | C <sub>12</sub> H <sub>24</sub> Ca <sub>2</sub> CoNi <sub>6</sub> O <sub>24</sub> | C <sub>12</sub> H <sub>24</sub> Sr <sub>2</sub> CoN <sub>4</sub> O <sub>18</sub> Cl <sub>2</sub> | C <sub>12</sub> H <sub>24</sub> Ba <sub>2</sub> CoN <sub>4</sub> O <sub>18</sub> Cl <sub>2</sub> | C <sub>12</sub> H <sub>24</sub> Ca <sub>2</sub> NiN <sub>6</sub> O <sub>24</sub> | C <sub>12</sub> H <sub>24</sub> Sr <sub>2</sub> NiN <sub>4</sub> O <sub>18</sub> Cl <sub>2</sub> |
| Formula weight                    | 775.46                                                                            | 817.42                                                                                           | 916.86                                                                                           | 775.24                                                                           | 817.20                                                                                           |
| Crystal system                    | Triclinic                                                                         | Triclinic                                                                                        | Triclinic                                                                                        | Triclinic                                                                        | Triclinic                                                                                        |
| space group                       | <i>P</i> -1                                                                       | <i>P</i> -1                                                                                      | <i>P</i> -1                                                                                      | <i>P</i> -1                                                                      | <i>P</i> -1                                                                                      |
| a (Å)                             | 6.6762(9)                                                                         | 6.5863(9)                                                                                        | 6.6953(4)                                                                                        | 6.6503(9)                                                                        | 6.6133(15)                                                                                       |
| b (Å)                             | 7.9864(11)                                                                        | 7.6421(11)                                                                                       | 7.6428(5)                                                                                        | 7.9533(11)                                                                       | 7.6512(17)                                                                                       |
| c (Å)                             | 13.7450(19)                                                                       | 13.809(2)                                                                                        | 14.0935(8)                                                                                       | 13.656(2)                                                                        | 13.778(3)                                                                                        |
| α (°)                             | 78.535(2)                                                                         | 96.335(2)                                                                                        | 96.5830(10)                                                                                      | 78.411(2)                                                                        | 96.312(4)                                                                                        |
| β (°)                             | 84.941(2)                                                                         | 94.647(2)                                                                                        | 95.1290(10)                                                                                      | 84.660(2)                                                                        | 95.186(3)                                                                                        |
| γ (°)                             | 76.907(2)                                                                         | 97.679(2)                                                                                        | 96.1710(10)                                                                                      | 77.080(2)                                                                        | 97.792(4)                                                                                        |
| V (Å <sup>3</sup> )               | 698.86(17)                                                                        | 681.37(17)                                                                                       | 708.48(7)                                                                                        | 688.77(17)                                                                       | 682.6(3)                                                                                         |
| Z                                 | 1                                                                                 | 1                                                                                                | 1                                                                                                | 1                                                                                | 1                                                                                                |
| F000                              | 397.0                                                                             | 405.0                                                                                            | 441.0                                                                                            | 398.0                                                                            | 406.0                                                                                            |
| Goodness-of-fit on F <sup>2</sup> | 1.000                                                                             | 1.082                                                                                            | 1.004                                                                                            | 1.003                                                                            | 1.008                                                                                            |
| R indices (all data)              | <i>R</i> <sub>I</sub> = 0.0787<br><i>wR</i> <sub>2</sub> = 0.1378                 | <i>R</i> <sub>I</sub> = 0.0585<br><i>wR</i> <sub>2</sub> = 0.0911                                | <i>R</i> <sub>I</sub> = 0.0197<br><i>wR</i> <sub>2</sub> = 0.0472                                | <i>R</i> <sub>I</sub> = 0.0429<br><i>wR</i> <sub>2</sub> = 0.1015                | <i>R</i> <sub>I</sub> = 0.0473<br><i>wR</i> <sub>2</sub> = 0.0882                                |
| Final R indices<br>[I > 2σ(I)]    | <i>R</i> <sub>I</sub> = 0.0563<br><i>wR</i> <sub>2</sub> = 0.1378                 | <i>R</i> <sub>I</sub> = 0.0439<br><i>wR</i> <sub>2</sub> = 0.0852                                | <i>R</i> <sub>I</sub> = 0.0190<br><i>wR</i> <sub>2</sub> = 0.0468                                | <i>R</i> <sub>I</sub> = 0.0373<br><i>wR</i> <sub>2</sub> = 0.0971                | <i>R</i> <sub>I</sub> = 0.0365<br><i>wR</i> <sub>2</sub> = 0.0820                                |

  

| 6                                                                                                | 7                                                                                | 8                                                                                                | 9                                                                                | 10                                                                                  |
|--------------------------------------------------------------------------------------------------|----------------------------------------------------------------------------------|--------------------------------------------------------------------------------------------------|----------------------------------------------------------------------------------|-------------------------------------------------------------------------------------|
| C <sub>12</sub> H <sub>24</sub> NiBa <sub>2</sub> N <sub>4</sub> O <sub>18</sub> Cl <sub>2</sub> | C <sub>12</sub> H <sub>20</sub> Ca <sub>2</sub> CuN <sub>6</sub> O <sub>22</sub> | C <sub>12</sub> H <sub>24</sub> Cl <sub>2</sub> Sr <sub>2</sub> CuN <sub>4</sub> O <sub>18</sub> | C <sub>12</sub> H <sub>24</sub> Sr <sub>2</sub> CuN <sub>6</sub> O <sub>24</sub> | C <sub>12</sub> H <sub>10</sub> Ba <sub>2</sub> CuN <sub>4</sub> O <sub>11</sub> Cl |
| 916.64                                                                                           | 744.04                                                                           | 822.03                                                                                           | 875.15                                                                           | 759.91                                                                              |
| Triclinic                                                                                        | Triclinic                                                                        | Triclinic                                                                                        | Monoclinic                                                                       | Monoclinic                                                                          |
| <i>P</i> -1                                                                                      | <i>P</i> -1                                                                      | <i>P</i> -1                                                                                      | <i>P</i> <sub>2</sub> /n                                                         | <i>C</i> 2/ <i>c</i>                                                                |
| 6.6818(9)                                                                                        | 7.7073(7)                                                                        | 6.5961(5)                                                                                        | 14.3621(13)                                                                      | 18.685(8)                                                                           |
| 7.6135(10)                                                                                       | 8.5422(8)                                                                        | 7.7866(6)                                                                                        | 6.9800(6)                                                                        | 11.722(5)                                                                           |
| 14.034(2)                                                                                        | 10.0834(9)                                                                       | 13.4353(11)                                                                                      | 15.7788(15)                                                                      | 9.244(4)                                                                            |
| 96.685(2)                                                                                        | 94.5500(10)                                                                      | 83.4050(10)                                                                                      | 90.00                                                                            | 90                                                                                  |
| 95.671(2)                                                                                        | 105.3350(10)                                                                     | 80.9610(10)                                                                                      | 114.1210(10)                                                                     | 91.771(6)                                                                           |
| 95.868(2)                                                                                        | 95.4270(10)                                                                      | 81.5450(10)                                                                                      | 90.00                                                                            | 90                                                                                  |
| 700.93(17)                                                                                       | 633.58(10)                                                                       | 671.10(9)                                                                                        | 1443.7(2)                                                                        | 2023.8(14)                                                                          |
| 1                                                                                                | 1                                                                                | 1                                                                                                | 2                                                                                | 4                                                                                   |
| 442.0                                                                                            | 379.0                                                                            | 407.0                                                                                            | 870.0                                                                            | 1424.0                                                                              |
| 1.057                                                                                            | 1.019                                                                            | 1.075                                                                                            | 1.011                                                                            | 1.437                                                                               |
| <i>R</i> <sub>I</sub> = 0.0353<br><i>wR</i> <sub>2</sub> = 0.0642                                | <i>R</i> <sub>I</sub> = 0.0401<br><i>wR</i> <sub>2</sub> = 0.0895                | <i>R</i> <sub>I</sub> = 0.0341<br><i>wR</i> <sub>2</sub> = 0.0701                                | <i>R</i> <sub>I</sub> = 0.0408<br><i>wR</i> <sub>2</sub> = 0.0819                | <i>R</i> <sub>I</sub> = 0.0693<br><i>wR</i> <sub>2</sub> = 0.2256                   |
| <i>R</i> <sub>I</sub> = 0.0318<br><i>wR</i> <sub>2</sub> = 0.0621                                | <i>R</i> <sub>I</sub> = 0.0356<br><i>wR</i> <sub>2</sub> = 0.0863                | <i>R</i> <sub>I</sub> = 0.0287<br><i>wR</i> <sub>2</sub> = 0.0727                                | <i>R</i> <sub>I</sub> = 0.0299<br><i>wR</i> <sub>2</sub> = 0.0761                | <i>R</i> <sub>I</sub> = 0.0676<br><i>wR</i> <sub>2</sub> = 0.2223                   |

$$^a R = \sum |F_0| - |F_C| / \sum |F_0|, wR_2 = [\sum [w(F_0^2 - F_C^2)^2] / \sum [(F_0^2)^2]]^{1/2}$$

**Table S2** Selected bond lengths/Å and bond angles/° in **1-10**.

| Compound 1          |            |                    |            |
|---------------------|------------|--------------------|------------|
| Co(1)-O(1)          | 2.066(4)   | O(18)-Ca(1)-O(5)#2 | 161.08(15) |
| Co(1)-O(1)#1        | 2.066(4)   | O(18)-Ca(1)-O(13)  | 90.17(16)  |
| Co(1)-N(1)#1        | 2.103(4)   | O(5)#2-Ca(1)-O(13) | 97.07(16)  |
| Co(1)-N(1)          | 2.103(4)   | O(18)-Ca(1)-O(11)  | 92.40(16)  |
| Co(1)-O(7)          | 2.113(4)   | O(5)#2-Ca(1)-O(11) | 87.02(15)  |
| Co(1)-O(7)#1        | 2.113(4)   | O(13)-Ca(1)-O(11)  | 159.16(17) |
| Ca(1)-O(18)         | 2.361(4)   | O(18)-Ca(1)-O(5)   | 128.98(15) |
| Ca(1)-O(5)#2        | 2.364(4)   | O(5)#2-Ca(1)-O(5)  | 69.42(14)  |
| Ca(1)-O(13)         | 2.379(4)   | O(13)-Ca(1)-O(5)   | 83.75(14)  |
| Ca(1)-O(11)         | 2.466(5)   | O(11)-Ca(1)-O(5)   | 78.57(16)  |
| Ca(1)-O(5)          | 2.479(4)   | O(18)-Ca(1)-O(20)  | 78.67(14)  |
| Ca(1)-O(20)         | 2.484(4)   | O(5)#2-Ca(1)-O(20) | 82.96(13)  |
| Ca(1)-O(10)         | 2.511(4)   | O(13)-Ca(1)-O(20)  | 126.10(14) |
| Ca(1)-O(6)          | 2.600(4)   | O(11)-Ca(1)-O(20)  | 74.62(15)  |
| O(5)-Ca(1)#2        | 2.364(4)   | O(5)-Ca(1)-O(20)   | 142.22(14) |
| O(1)-Co(1)-O(1)#1   | 180        | O(18)-Ca(1)-O(10)  | 80.98(16)  |
| O(1)-Co(1)-N(1)#1   | 100.85(15) | O(5)#2-Ca(1)-O(10) | 83.96(14)  |
| O(1)#1-Co(1)-N(1)#1 | 79.15(15)  | O(13)-Ca(1)-O(10)  | 75.45(14)  |
| O(1)-Co(1)-N(1)     | 79.15(15)  | O(11)-Ca(1)-O(10)  | 125.37(16) |
| O(1)#1-Co(1)-N(1)   | 100.85(15) | O(5)-Ca(1)-O(10)   | 143.82(14) |
| N(1)#1-Co(1)-N(1)   | 180        | O(20)-Ca(1)-O(10)  | 50.83(13)  |
| O(1)-Co(1)-O(7)     | 90.76(15)  | O(18)-Ca(1)-O(6)   | 77.63(14)  |
| O(1)#1-Co(1)-O(7)   | 89.24(15)  | O(5)#2-Ca(1)-O(6)  | 120.81(12) |
| N(1)#1-Co(1)-O(7)   | 89.11(16)  | O(13)-Ca(1)-O(6)   | 79.60(14)  |
| N(1)-Co(1)-O(7)     | 90.89(16)  | O(11)-Ca(1)-O(6)   | 80.76(15)  |
| O(1)-Co(1)-O(7)#1   | 89.24(15)  | O(5)-Ca(1)-O(6)    | 51.41(11)  |
| O(1)#1-Co(1)-O(7)#1 | 90.76(15)  | O(20)-Ca(1)-O(6)   | 144.80(14) |
| N(1)#1-Co(1)-O(7)#1 | 90.89(16)  | O(10)-Ca(1)-O(6)   | 146.88(14) |
| N(1)-Co(1)-O(7)#1   | 89.11(16)  | Ca(2)#2-O(1)-Ca(1) | 110.58(14) |
| O(7)-Co(1)-O(7)#1   | 180        |                    |            |

Symmetry transformations used to generate equivalent atoms:  
#1 -x+1,-y+1,-z #2 -x+1,-y,-z+1

| Compound 2   |          |                     |            |
|--------------|----------|---------------------|------------|
| Sr(1)-O(4)#1 | 2.590(4) | O(2)-Sr(1)-O(3)#2   | 137.99(12) |
| Sr(1)-O(6)   | 2.596(4) | O(7)-Sr(1)-O(3)#2   | 141.85(12) |
| Sr(1)-O(2)   | 2.601(3) | O(8)-Sr(1)-O(3)#2   | 95.09(11)  |
| Sr(1)-O(7)   | 2.611(4) | O(9)-Sr(1)-O(3)#2   | 74.93(11)  |
| Sr(1)-O(8)   | 2.637(3) | O(4)#1-Sr(1)-O(4)#2 | 63.66(13)  |
| Sr(1)-O(9)   | 2.645(3) | O(6)-Sr(1)-O(4)#2   | 122.84(13) |
| Sr(1)-O(3)#2 | 2.726(4) | O(2)-Sr(1)-O(4)#2   | 138.15(12) |
| Sr(1)-O(4)#2 | 2.749(4) | O(7)-Sr(1)-O(4)#2   | 137.96(13) |
| Sr(1)-O(8)#2 | 2.824(4) | O(8)-Sr(1)-O(4)#2   | 68.44(11)  |
| Co(1)-O(1)#3 | 2.075(3) | O(9)-Sr(1)-O(4)#2   | 79.07(11)  |
| Co(1)-O(1)   | 2.075(3) | O(3)#2-Sr(1)-O(4)#2 | 47.41(11)  |
| Co(1)-O(5)#3 | 2.089(4) | O(4)#1-Sr(1)-O(8)#2 | 141.28(11) |

|                     |            |                      |            |
|---------------------|------------|----------------------|------------|
| Co(1)-O(5)          | 2.089(4)   | O(6)-Sr(1)-O(8)#2    | 67.79(12)  |
| Co(1)-N(1)#3        | 2.120(4)   | O(2)-Sr(1)-O(8)#2    | 77.31(11)  |
| Co(1)-N(1)          | 2.120(4)   | O(7)-Sr(1)-O(8)#2    | 134.94(13) |
| O(3)-Sr(1)#2        | 2.726(4)   | O(8)-Sr(1)-O(8)#2    | 68.09(13)  |
| O(4)-Sr(1)#4        | 2.590(4)   | O(9)-Sr(1)-O(8)#2    | 129.71(11) |
| O(4)-Sr(1)#2        | 2.749(4)   | O(3)#2-Sr(1)-O(8)#2  | 60.75(11)  |
| O(8)-Sr(1)#2        | 2.824(4)   | O(4)#2-Sr(1)-O(8)#2  | 87.02(11)  |
| O(4)#1-Sr(1)-O(6)   | 149.13(12) | O(1)#3-Co(1)-O(1)    | 180        |
| O(4)#1-Sr(1)-O(2)   | 107.19(12) | O(1)#3-Co(1)-O(5)#3  | 88.34(15)  |
| O(6)-Sr(1)-O(2)     | 86.73(13)  | O(1)-Co(1)-O(5)#3    | 91.66(15)  |
| O(4)#1-Sr(1)-O(7)   | 78.76(14)  | O(1)#3-Co(1)-O(5)    | 91.66(15)  |
| O(6)-Sr(1)-O(7)     | 81.03(16)  | O(1)-Co(1)-O(5)      | 88.34(15)  |
| O(2)-Sr(1)-O(7)     | 68.95(12)  | O(5)#3-Co(1)-O(5)    | 180        |
| O(4)#1-Sr(1)-O(8)   | 77.43(12)  | O(1)#3-Co(1)-N(1)#3  | 78.26(14)  |
| O(6)-Sr(1)-O(8)     | 133.40(12) | O(1)-Co(1)-N(1)#3    | 101.74(14) |
| O(2)-Sr(1)-O(8)     | 69.71(11)  | O(5)#3-Co(1)-N(1)#3  | 92.39(16)  |
| O(7)-Sr(1)-O(8)     | 122.65(13) | O(5)-Co(1)-N(1)#3    | 87.61(16)  |
| O(4)#1-Sr(1)-O(9)   | 71.60(12)  | O(1)#3-Co(1)-N(1)    | 101.74(14) |
| O(6)-Sr(1)-O(9)     | 79.97(12)  | O(1)-Co(1)-N(1)      | 78.26(14)  |
| O(2)-Sr(1)-O(9)     | 139.65(11) | O(5)#3-Co(1)-N(1)    | 87.61(16)  |
| O(7)-Sr(1)-O(9)     | 71.41(11)  | O(5)-Co(1)-N(1)      | 92.39(16)  |
| O(8)-Sr(1)-O(9)     | 142.53(12) | N(1)#3-Co(1)-N(1)    | 180        |
| O(4)#1-Sr(1)-O(3)#2 | 107.10(12) | Sr(1)#4-O(4)-Sr(1)#2 | 116.34(13) |
| O(6)-Sr(1)-O(3)#2   | 75.89(13)  | Sr(1)-O(8)-Sr(1)#2   | 111.91(13) |

Symmetry transformations used to generate equivalent atoms:

#1 x+1,y,z #2 -x+1,-y+1,-z #3 -x+1,-y+1,-z+1 #4 x-1,y,z #5 -x+2,-y+1,-z

---

Compound 3

---

|                     |            |                     |            |
|---------------------|------------|---------------------|------------|
| Ba(1)-O(1)#1        | 2.733(3)   | O(5)-Ba(1)-O(8)     | 142.99(11) |
| Ba(1)-O(9)#2        | 2.746(3)   | O(6)-Ba(1)-O(8)     | 94.28(9)   |
| Ba(1)-O(4)          | 2.786(3)   | O(7)-Ba(1)-O(8)     | 76.21(11)  |
| Ba(1)-O(5)          | 2.788(4)   | O(1)#1-Ba(1)-O(6)#1 | 80.74(9)   |
| Ba(1)-O(6)          | 2.811(3)   | O(9)#2-Ba(1)-O(6)#1 | 142.55(9)  |
| Ba(1)-O(7)          | 2.855(4)   | O(4)-Ba(1)-O(6)#1   | 132.79(9)  |
| Ba(1)-O(8)          | 2.856(3)   | O(5)-Ba(1)-O(6)#1   | 133.66(11) |
| Ba(1)-O(6)#1        | 2.895(3)   | O(6)-Ba(1)-O(6)#1   | 71.56(10)  |
| Ba(1)-O(9)          | 2.909(3)   | O(7)-Ba(1)-O(6)#1   | 68.10(9)   |
| Co(1)-O(2)#3        | 2.069(3)   | O(8)-Ba(1)-O(6)#1   | 61.76(9)   |
| Co(1)-O(2)          | 2.069(3)   | O(1)#1-Ba(1)-O(9)   | 134.42(9)  |
| Co(1)-O(3)#3        | 2.106(3)   | O(9)#2-Ba(1)-O(9)   | 64.64(10)  |
| Co(1)-O(3)          | 2.106(3)   | O(4)-Ba(1)-O(9)     | 81.82(9)   |
| Co(1)-N(1)#3        | 2.117(3)   | O(5)-Ba(1)-O(9)     | 141.04(11) |
| Co(1)-N(1)          | 2.117(3)   | O(6)-Ba(1)-O(9)     | 65.27(9)   |
| O(1)-Ba(1)#1        | 2.733(3)   | O(7)-Ba(1)-O(9)     | 120.61(11) |
| O(6)-Ba(1)#1        | 2.895(3)   | O(8)-Ba(1)-O(9)     | 44.69(8)   |
| O(9)-Ba(1)#2        | 2.746(3)   | O(6)#1-Ba(1)-O(9)   | 85.25(8)   |
| O(1)#1-Ba(1)-O(9)#2 | 104.07(10) | O(2)#3-Co(1)-O(2)   | 180        |
| O(1)#1-Ba(1)-O(4)   | 137.05(9)  | O(2)#3-Co(1)-O(3)#3 | 88.85(12)  |
| O(9)#2-Ba(1)-O(4)   | 67.09(9)   | O(2)-Co(1)-O(3)#3   | 91.15(12)  |

|                   |            |                     |            |
|-------------------|------------|---------------------|------------|
| O(1)#1-Ba(1)-O(5) | 67.19(11)  | O(2)#3-Co(1)-O(3)   | 91.15(12)  |
| O(9)#2-Ba(1)-O(5) | 79.63(11)  | O(2)-Co(1)-O(3)     | 88.85(12)  |
| O(4)-Ba(1)-O(5)   | 69.86(11)  | O(3)#3-Co(1)-O(3)   | 180        |
| O(1)#1-Ba(1)-O(6) | 69.15(9)   | O(2)#3-Co(1)-N(1)#3 | 78.29(12)  |
| O(9)#2-Ba(1)-O(6) | 75.64(9)   | O(2)-Co(1)-N(1)#3   | 101.71(12) |
| O(4)-Ba(1)-O(6)   | 138.25(9)  | O(3)#3-Co(1)-N(1)#3 | 91.68(13)  |
| O(5)-Ba(1)-O(6)   | 121.77(11) | O(3)-Co(1)-N(1)#3   | 88.32(13)  |
| O(1)#1-Ba(1)-O(7) | 93.67(11)  | O(2)#3-Co(1)-N(1)   | 101.71(12) |
| O(9)#2-Ba(1)-O(7) | 146.10(9)  | O(2)-Co(1)-N(1)     | 78.29(12)  |
| O(4)-Ba(1)-O(7)   | 80.18(9)   | O(3)#3-Co(1)-N(1)   | 88.32(13)  |
| O(5)-Ba(1)-O(7)   | 81.09(12)  | O(3)-Co(1)-N(1)     | 91.68(13)  |
| O(6)-Ba(1)-O(7)   | 138.19(9)  | N(1)#3-Co(1)-N(1)   | 180        |
| O(1)#1-Ba(1)-O(8) | 142.35(9)  | Ba(1)-O(6)-Ba(1)#1  | 108.44(10) |
| O(9)#2-Ba(1)-O(8) | 103.96(9)  | Ba(1)#2-O(9)-Ba(1)  | 115.36(10) |
| O(4)-Ba(1)-O(8)   | 77.68(9)   |                     |            |

Symmetry transformations used to generate equivalent atoms:  
 #1 -x+1,-y+2,-z+1 #2 -x,-y+2,-z+1 #3 -x+1,-y+2,-z+2

---

Compound 4

---

|                      |            |                    |            |
|----------------------|------------|--------------------|------------|
| Ni(1)-N(2)#1         | 2.040(2)   | O(6)-Ca(1)-O(4)#2  | 161.16(8)  |
| Ni(1)-N(2)           | 2.040(2)   | O(6)-Ca(1)-O(7)    | 89.13(9)   |
| Ni(1)-O(1)#1         | 2.052(2)   | O(4)#2-Ca(1)-O(7)  | 97.85(8)   |
| Ni(1)-O(1)           | 2.052(2)   | O(6)-Ca(1)-O(5)    | 93.43(10)  |
| Ni(1)-O(11)#1        | 2.101(2)   | O(4)#2-Ca(1)-O(5)  | 86.34(9)   |
| Ni(1)-O(11)          | 2.101(2)   | O(7)-Ca(1)-O(5)    | 158.90(10) |
| Ca(1)-O(6)           | 2.357(2)   | O(6)-Ca(1)-O(4)    | 128.93(8)  |
| Ca(1)-O(4)#2         | 2.3602(19) | O(4)#2-Ca(1)-O(4)  | 69.44(7)   |
| Ca(1)-O(7)           | 2.371(2)   | O(7)-Ca(1)-O(4)    | 84.28(8)   |
| Ca(1)-O(5)           | 2.448(3)   | O(5)-Ca(1)-O(4)    | 77.83(10)  |
| Ca(1)-O(4)           | 2.472(2)   | O(6)-Ca(1)-O(8)    | 78.82(8)   |
| Ca(1)-O(8)           | 2.476(2)   | O(4)#2-Ca(1)-O(8)  | 82.96(7)   |
| Ca(1)-O(10)          | 2.504(2)   | O(7)-Ca(1)-O(8)    | 126.15(8)  |
| Ca(1)-O(3)           | 2.592(2)   | O(5)-Ca(1)-O(8)    | 74.81(10)  |
| O(4)-Ca(1)#2         | 2.3602(19) | O(4)-Ca(1)-O(8)    | 142.04(7)  |
| N(2)#1-Ni(1)-N(2)    | 180        | O(6)-Ca(1)-O(10)   | 80.90(9)   |
| N(2)#1-Ni(1)-O(1)#1  | 80.76(8)   | O(4)#2-Ca(1)-O(10) | 83.90(8)   |
| N(2)-Ni(1)-O(1)#1    | 99.24(8)   | O(7)-Ca(1)-O(10)   | 75.66(8)   |
| N(2)#1-Ni(1)-O(1)    | 99.24(8)   | O(5)-Ca(1)-O(10)   | 125.43(10) |
| N(2)-Ni(1)-O(1)      | 80.76(8)   | O(4)-Ca(1)-O(10)   | 144.02(8)  |
| O(1)#1-Ni(1)-O(1)    | 180        | O(8)-Ca(1)-O(10)   | 50.75(7)   |
| N(2)#1-Ni(1)-O(11)#1 | 90.98(9)   | O(6)-Ca(1)-O(3)    | 77.76(8)   |
| N(2)-Ni(1)-O(11)#1   | 89.02(9)   | O(4)#2-Ca(1)-O(3)  | 120.63(7)  |
| O(1)#1-Ni(1)-O(11)#1 | 91.48(8)   | O(7)-Ca(1)-O(3)    | 79.64(8)   |
| O(1)-Ni(1)-O(11)#1   | 88.52(8)   | O(5)-Ca(1)-O(3)    | 80.45(9)   |
| N(2)#1-Ni(1)-O(11)   | 89.02(9)   | O(4)-Ca(1)-O(3)    | 51.22(6)   |
| N(2)-Ni(1)-O(11)     | 90.98(9)   | O(8)-Ca(1)-O(3)    | 144.57(8)  |
| O(1)#1-Ni(1)-O(11)   | 88.52(8)   | O(10)-Ca(1)-O(3)   | 147.40(7)  |
| O(1)-Ni(1)-O(11)     | 91.48(8)   | Ca(1)#2-O(4)-Ca(1) | 110.56(7)  |
| O(112)#1-Ni(1)-O(11) | 180        |                    |            |

Symmetry transformations used to generate equivalent atoms:  
 #1 -x,-y+1,-z+1 #2 -x,-y+2,-z

---

Compound 5

---

|                     |            |                      |            |
|---------------------|------------|----------------------|------------|
| Sr(1)-O(4)#1        | 2.597(4)   | O(7)-Sr(1)-O(3)#2    | 94.72(13)  |
| Sr(1)-O(2)          | 2.608(3)   | O(8)-Sr(1)-O(3)#2    | 75.70(13)  |
| Sr(1)-O(7)          | 2.614(4)   | O(6)-Sr(1)-O(3)#2    | 142.09(13) |
| Sr(1)-O(8)          | 2.619(5)   | O(9)-Sr(1)-O(3)#2    | 74.78(12)  |
| Sr(1)-O(6)          | 2.619(4)   | O(4)#1-Sr(1)-O(4)#2  | 63.61(14)  |
| Sr(1)-O(9)          | 2.658(4)   | O(2)-Sr(1)-O(4)#2    | 138.15(12) |
| Sr(1)-O(3)#2        | 2.730(4)   | O(7)-Sr(1)-O(4)#2    | 67.65(13)  |
| Sr(1)-O(4)#2        | 2.769(4)   | O(8)-Sr(1)-O(4)#2    | 122.94(13) |
| Sr(1)-O(7)#2        | 2.848(4)   | O(6)-Sr(1)-O(4)#2    | 137.76(13) |
| Ni(1)-O(1)          | 2.055(3)   | O(9)-Sr(1)-O(4)#2    | 79.14(12)  |
| Ni(1)-O(1)#4        | 2.055(3)   | O(3)#2-Sr(1)-O(4)#2  | 47.64(11)  |
| Ni(1)-N(1)          | 2.059(4)   | O(4)#1-Sr(1)-O(7)#2  | 141.50(12) |
| Ni(1)-N(1)#4        | 2.059(4)   | O(2)-Sr(1)-O(7)#2    | 77.35(13)  |
| Ni(1)-O(5)          | 2.086(4)   | O(7)-Sr(1)-O(7)#2    | 67.87(15)  |
| Ni(1)-O(5)#4        | 2.086(4)   | O(8)-Sr(1)-O(7)#2    | 67.59(13)  |
| O(1)-Sr(1)#2        | 2.730(4)   | O(6)-Sr(1)-O(7)#2    | 135.05(13) |
| O(4)-Sr(1)#5        | 2.597(4)   | O(9)-Sr(1)-O(7)#2    | 130.04(13) |
| O(4)-Sr(1)#2        | 2.769(4)   | O(3)#2-Sr(1)-O(7)#2  | 61.13(12)  |
| O(7)-Sr(1)#2        | 2.848(4)   | O(4)#2-Sr(1)-O(7)#2  | 87.16(11)  |
| O(4)#1-Sr(1)-O(2)   | 107.22(13) | O(1)-Ni(1)-O(1)#4    | 180        |
| O(4)#1-Sr(1)-O(7)   | 77.62(13)  | O(1)-Ni(1)-N(1)      | 80.09(14)  |
| O(2)-Sr(1)-O(7)     | 70.49(13)  | O(1)#4-Ni(1)-N(1)    | 99.91(14)  |
| O(4)#1-Sr(1)-O(8)   | 149.11(13) | O(1)-Ni(1)-N(1)#4    | 99.91(14)  |
| O(2)-Sr(1)-O(8)     | 86.67(14)  | O(1)#4-Ni(1)-N(1)#4  | 80.09(14)  |
| O(7)-Sr(1)-O(8)     | 133.26(13) | N(1)-Ni(1)-N(1)#4    | 180        |
| O(4)#1-Sr(1)-O(6)   | 78.23(14)  | O(1)-Ni(1)-O(5)      | 89.11(14)  |
| O(2)-Sr(1)-O(6)     | 68.50(12)  | O(1)#4-Ni(1)-O(5)    | 90.89(14)  |
| O(7)-Sr(1)-O(6)     | 122.69(15) | N(1)-Ni(1)-O(5)      | 91.30(16)  |
| O(8)-Sr(1)-O(6)     | 81.76(16)  | N(1)#4-Ni(1)-O(5)    | 88.70(16)  |
| O(4)#1-Sr(1)-O(9)   | 71.16(13)  | O(1)-Ni(1)-O(5)#4    | 90.89(14)  |
| O(2)-Sr(1)-O(9)     | 139.41(12) | O(1)#4-Ni(1)-O(5)#4  | 89.11(14)  |
| O(7)-Sr(1)-O(9)     | 141.97(12) | N(1)-Ni(1)-O(5)#4    | 88.70(16)  |
| O(8)-Sr(1)-O(9)     | 80.34(13)  | N(1)#4-Ni(1)-O(5)#4  | 91.30(16)  |
| O(6)-Sr(1)-O(9)     | 71.64(13)  | O(5)-Ni(1)-O(5)#4    | 180        |
| O(4)#1-Sr(1)-O(3)#2 | 107.01(11) | Sr(1)#5-O(4)-Sr(1)#2 | 116.39(14) |
| O(2)-Sr(1)-O(3)#2   | 138.40(12) | Sr(1)-O(7)-Sr(1)#2   | 112.13(15) |

Symmetry transformations used to generate equivalent atoms:  
 #1 x-1,y,z #2 -x,-y+2,-z+1 #3 -x-1,-y+2,-z+1 #4 -x,-y+2,-z #5 x+1,y,z

---

Compound 6

---

|              |          |                     |            |
|--------------|----------|---------------------|------------|
| Ba(1)-O(4)#1 | 2.732(4) | O(6)-Ba(1)-O(3)#2   | 77.35(11)  |
| Ba(1)-O(2)   | 2.738(3) | O(9)-Ba(1)-O(3)#2   | 142.50(12) |
| Ba(1)-O(6)   | 2.781(3) | O(7)-Ba(1)-O(3)#2   | 94.16(10)  |
| Ba(1)-O(9)   | 2.792(4) | O(8)-Ba(1)-O(3)#2   | 75.54(12)  |
| Ba(1)-O(7)   | 2.816(3) | O(4)#1-Ba(1)-O(7)#2 | 142.65(10) |

|                     |            |                      |            |
|---------------------|------------|----------------------|------------|
| Ba(1)-O(8)          | 2.852(4)   | O(2)-Ba(1)-O(7)#2    | 81.04(11)  |
| Ba(1)-O(3)#2        | 2.855(4)   | O(6)-Ba(1)-O(7)#2    | 132.68(10) |
| Ba(1)-O(7)#2        | 2.886(4)   | O(9)-Ba(1)-O(7)#2    | 133.46(13) |
| Ba(1)-O(4)#2        | 2.925(4)   | O(7)-Ba(1)-O(7)#2    | 71.62(12)  |
| Ba(1)-C(7)#2        | 3.242(5)   | O(8)-Ba(1)-O(7)#2    | 68.32(11)  |
| Ni(1)-O(1)          | 2.049(3)   | O(3)#2-Ba(1)-O(7)#2  | 61.95(11)  |
| Ni(1)-O(1)#3        | 2.049(3)   | O(4)#1-Ba(1)-O(4)#2  | 64.44(12)  |
| Ni(1)-N(1)#3        | 2.058(4)   | O(2)-Ba(1)-O(4)#2    | 134.14(11) |
| Ni(1)-N(1)          | 2.058(4)   | O(6)-Ba(1)-O(4)#2    | 81.79(11)  |
| Ni(1)-O(5)#3        | 2.083(4)   | O(9)-Ba(1)-O(4)#2    | 141.14(13) |
| Ni(1)-O(5)          | 2.083(4)   | O(7)-Ba(1)-O(4)#2    | 64.80(10)  |
| O(3)-Ba(1)#2        | 2.855(4)   | O(8)-Ba(1)-O(4)#2    | 120.08(11) |
| O(4)-Ba(1)#4        | 2.732(4)   | O(3)#2-Ba(1)-O(4)#2  | 44.85(10)  |
| O(4)-Ba(1)#2        | 2.925(4)   | O(7)#2-Ba(1)-O(4)#2  | 85.34(10)  |
| O(7)-Ba(1)#2        | 2.886(4)   | O(1)-Ni(1)-O(1)#3    | 180        |
| O(4)#1-Ba(1)-O(2)   | 103.90(12) | O(1)-Ni(1)-N(1)#3    | 99.98(15)  |
| O(4)#1-Ba(1)-O(6)   | 66.91(11)  | O(1)#3-Ni(1)-N(1)#3  | 80.02(14)  |
| O(2)-Ba(1)-O(6)     | 137.05(11) | O(1)-Ni(1)-N(1)      | 80.02(15)  |
| O(4)#1-Ba(1)-O(9)   | 79.93(13)  | O(1)#3-Ni(1)-N(1)    | 99.98(15)  |
| O(2)-Ba(1)-O(9)     | 67.24(11)  | N(1)#3-Ni(1)-N(1)    | 180        |
| O(6)-Ba(1)-O(9)     | 69.83(11)  | O(1)-Ni(1)-O(5)#3    | 89.09(14)  |
| O(4)#1-Ba(1)-O(7)   | 75.67(11)  | O(1)#3-Ni(1)-O(5)#3  | 90.91(14)  |
| O(2)-Ba(1)-O(7)     | 69.34(11)  | N(1)#3-Ni(1)-O(5)#3  | 89.19(15)  |
| O(6)-Ba(1)-O(7)     | 137.97(11) | N(1)-Ni(1)-O(5)#3    | 90.81(15)  |
| O(9)-Ba(1)-O(7)     | 122.36(13) | O(1)-Ni(1)-O(5)      | 90.91(14)  |
| O(4)#1-Ba(1)-O(8)   | 145.39(12) | O(1)#3-Ni(1)-O(5)    | 89.09(14)  |
| O(2)-Ba(1)-O(8)     | 94.88(13)  | N(1)#3-Ni(1)-O(5)    | 90.81(15)  |
| O(6)-Ba(1)-O(8)     | 79.48(11)  | N(1)-Ni(1)-O(5)      | 89.19(15)  |
| O(9)-Ba(1)-O(8)     | 81.00(15)  | O(5)#3-Ni(1)-O(5)    | 180        |
| O(7)-Ba(1)-O(8)     | 138.77(11) | Ba(1)#4-O(4)-Ba(1)#2 | 115.56(12) |
| O(4)#1-Ba(1)-O(3)#2 | 103.70(11) | Ba(1)-O(7)-Ba(1)#2   | 108.38(12) |
| O(2)-Ba(1)-O(3)#2   | 142.82(12) |                      |            |

Symmetry transformations used to generate equivalent atoms:

#1 x-1,y,z #2 -x+1,-y+1,-z+1 #3 -x+1,-y+1,-z #4 x+1,y,z #5 -x,-y+1,-z+1

---

Compound 7

---

|              |            |                    |           |
|--------------|------------|--------------------|-----------|
| Cu(1)-O(1)#1 | 1.9645(18) | O(3)#2-Ca(1)-O(11) | 85.98(9)  |
| Cu(1)-O(1)   | 1.9645(18) | O(9)-Ca(1)-O(11)   | 156.00(9) |
| Cu(1)-N(1)   | 1.990(2)   | O(3)#2-Ca(1)-O(10) | 164.78(7) |
| Cu(1)-N(1)#1 | 1.990(2)   | O(9)-Ca(1)-O(10)   | 95.46(8)  |
| Cu(1)-O(5)   | 2.538(2)   | O(11)-Ca(1)-O(10)  | 95.93(9)  |
| Ca(1)-O(3)#2 | 2.3203(19) | O(3)#2-Ca(1)-O(8)  | 84.24(8)  |
| Ca(1)-O(9)   | 2.366(2)   | O(9)-Ca(1)-O(8)    | 77.14(7)  |
| Ca(1)-O(11)  | 2.380(2)   | O(11)-Ca(1)-O(8)   | 125.34(8) |
| Ca(1)-O(10)  | 2.387(2)   | O(10)-Ca(1)-O(8)   | 82.35(8)  |
| Ca(1)-O(8)   | 2.515(2)   | O(3)#2-Ca(1)-O(4)  | 122.48(7) |
| Ca(1)-O(4)   | 2.549(2)   | O(9)-Ca(1)-O(4)    | 83.98(8)  |
| Ca(1)-O(6)   | 2.566(2)   | O(11)-Ca(1)-O(4)   | 79.39(8)  |

|                     |            |                    |           |
|---------------------|------------|--------------------|-----------|
| Ca(1)-O(3)          | 2.584(2)   | O(10)-Ca(1)-O(4)   | 72.63(7)  |
| Ca(1)-C(6)          | 2.903(3)   | O(8)-Ca(1)-O(4)    | 146.94(8) |
| Ca(1)-N(3)          | 2.949(2)   | O(3)#2-Ca(1)-O(6)  | 80.12(7)  |
| O(3)-Ca(1)#2        | 2.3203(19) | O(9)-Ca(1)-O(6)    | 126.54(7) |
| O(1)#1-Cu(1)-O(1)   | 180        | O(11)-Ca(1)-O(6)   | 75.39(8)  |
| O(1)#1-Cu(1)-N(1)   | 96.91(8)   | O(10)-Ca(1)-O(6)   | 85.74(7)  |
| O(1)-Cu(1)-N(1)     | 83.09(8)   | O(8)-Ca(1)-O(6)    | 49.96(7)  |
| O(1)#1-Cu(1)-N(1)#1 | 83.09(8)   | O(4)-Ca(1)-O(6)    | 144.68(7) |
| O(1)-Cu(1)-N(1)#1   | 96.91(8)   | O(3)#2-Ca(1)-O(3)  | 71.95(7)  |
| N(1)-Cu(1)-N(1)#1   | 180        | O(9)-Ca(1)-O(3)    | 79.43(7)  |
| O(1)#1-Cu(1)-O(5)   | 91.70(7)   | O(11)-Ca(1)-O(3)   | 76.65(8)  |
| O(1)-Cu(1)-O(5)     | 88.30(7)   | O(10)-Ca(1)-O(3)   | 123.21(7) |
| N(1)-Cu(1)-O(5)     | 89.18(8)   | O(8)-Ca(1)-O(3)    | 146.82(7) |
| N(1)#1-Cu(1)-O(5)   | 90.82(8)   | O(4)-Ca(1)-O(3)    | 50.59(6)  |
| O(3)#2-Ca(1)-O(9)   | 88.53(8)   | O(6)-Ca(1)-O(3)    | 141.47(7) |
| Cu(1)-O(1)#1        | 1.9645(18) | O(3)#2-Ca(1)-O(11) | 85.98(9)  |
| Cu(1)-O(1)          | 1.9645(18) | O(9)-Ca(1)-O(11)   | 156.00(9) |
| Cu(1)-N(1)          | 1.990(2)   | O(3)#2-Ca(1)-O(10) | 164.78(7) |
| Cu(1)-N(1)#1        | 1.990(2)   | O(9)-Ca(1)-O(10)   | 95.46(8)  |

Symmetry transformations used to generate equivalent atoms:

#1 -x+1,-y,-z+1 #2 -x,-y+1,-z

---

Compound 8

---

|                   |            |                     |            |
|-------------------|------------|---------------------|------------|
| Sr(1)-O(2)        | 2.508(3)   | O(9)-Sr(1)-O(1)     | 144.65(9)  |
| Sr(1)-O(7)        | 2.519(3)   | O(6)#2-Sr(1)-O(1)   | 140.68(11) |
| Sr(1)-O(4)#1      | 2.612(2)   | O(4)-Sr(1)-O(1)     | 76.12(11)  |
| Sr(1)-O(9)        | 2.625(3)   | O(2)-Sr(1)-O(9)#2   | 71.85(10)  |
| Sr(1)-O(6)#2      | 2.647(2)   | O(7)-Sr(1)-O(9)#2   | 134.40(8)  |
| Sr(1)-O(4)        | 2.649(2)   | O(4)#1-Sr(1)-O(9)#2 | 137.90(8)  |
| Sr(1)-O(1)        | 2.713(3)   | O(9)-Sr(1)-O(9)#2   | 67.06(10)  |
| Sr(1)-O(9)#2      | 2.854(3)   | O(6)#2-Sr(1)-O(9)#2 | 74.94(8)   |
| Sr(1)-O(3)        | 2.921(2)   | O(4)-Sr(1)-O(9)#2   | 86.42(8)   |
| Cu(1)-O(5)#3      | 1.981(2)   | O(1)-Sr(1)-O(9)#2   | 128.98(13) |
| Cu(1)-O(5)        | 1.981(2)   | O(2)-Sr(1)-O(3)     | 73.83(9)   |
| Cu(1)-N(1)#3      | 1.995(3)   | O(7)-Sr(1)-O(3)     | 142.90(8)  |
| Cu(1)-N(1)        | 1.995(3)   | O(4)#1-Sr(1)-O(3)   | 109.26(7)  |
| Cu(1)-Cl(1)       | 2.7480(10) | O(9)-Sr(1)-O(3)     | 96.28(8)   |
| Cu(1)-Cl(1)#3     | 2.7480(10) | O(6)#2-Sr(1)-O(3)   | 133.03(8)  |
| O(4)-Sr(1)#1      | 2.612(2)   | O(4)-Sr(1)-O(3)     | 46.49(7)   |
| O(6)-Sr(1)#2      | 2.647(2)   | O(1)-Sr(1)-O(3)     | 75.59(13)  |
| O(9)-Sr(1)#2      | 2.854(3)   | O(9)#2-Sr(1)-O(3)   | 58.49(7)   |
| O(2)-Sr(1)-O(7)   | 79.22(9)   | O(5)#3-Cu(1)-O(5)   | 180        |
| O(2)-Sr(1)-O(4)#1 | 148.12(11) | O(5)#3-Cu(1)-N(1)#3 | 82.02(10)  |
| O(7)-Sr(1)-O(4)#1 | 81.44(8)   | O(5)-Cu(1)-N(1)#3   | 97.98(10)  |
| O(2)-Sr(1)-O(9)   | 136.27(11) | O(5)#3-Cu(1)-N(1)   | 97.98(10)  |
| O(7)-Sr(1)-O(9)   | 120.81(9)  | O(5)-Cu(1)-N(1)     | 82.02(10)  |
| O(4)#1-Sr(1)-O(9) | 75.58(8)   | N(1)#3-Cu(1)-N(1)   | 180        |
| O(2)-Sr(1)-O(6)#2 | 87.11(11)  | O(5)#3-Cu(1)-Cl(1)  | 94.34(8)   |
| O(7)-Sr(1)-O(6)#2 | 69.04(8)   | O(5)-Cu(1)-Cl(1)    | 85.66(8)   |



|                     |           |                      |            |
|---------------------|-----------|----------------------|------------|
| O(4)#1-Sr(1)-O(6)#2 | 109.19(8) | N(1)#3-Cu(1)-Cl(1)   | 91.34(8)   |
| O(9)-Sr(1)-O(6)#2   | 68.63(8)  | N(1)-Cu(1)-Cl(1)     | 88.66(8)   |
| O(2)-Sr(1)-O(4)     | 118.31(9) | O(5)#3-Cu(1)-Cl(1)#3 | 85.66(8)   |
| O(7)-Sr(1)-O(4)     | 138.91(8) | O(5)-Cu(1)-Cl(1)#3   | 94.34(8)   |
| O(4)#1-Sr(1)-O(4)   | 64.53(8)  | N(1)#3-Cu(1)-Cl(1)#3 | 88.66(8)   |
| O(9)-Sr(1)-O(4)     | 73.81(8)  | N(1)-Cu(1)-Cl(1)#3   | 91.34(8)   |
| O(6)#2-Sr(1)-O(4)   | 142.14(8) | Cl(1)-Cu(1)-Cl(1)#3  | 180        |
| O(2)-Sr(1)-O(1)     | 75.28(13) | Sr(1)#1-O(4)-Sr(1)   | 115.47(8)  |
| O(7)-Sr(1)-O(1)     | 73.22(13) | Sr(1)-O(9)-Sr(1)#2   | 112.94(10) |
| O(4)#1-Sr(1)-O(1)   | 74.99(11) |                      |            |

Symmetry transformations used to generate equivalent atoms:

#1 -x+1,-y+1,-z+1 #2 -x,-y+1,-z+1 #3 -x,-y+1,-z+2

---

**Compound 9**

|                    |            |                     |            |
|--------------------|------------|---------------------|------------|
| O(1)-Cu(2)         | 1.933(3)   | O(3)#1-Sr(1)-O(8)   | 90.46(11)  |
| Sr(1)-O(4)         | 2.553(3)   | O(4)-Sr(1)-O(6)     | 86.54(12)  |
| Sr(1)-O(9)         | 2.574(3)   | O(9)-Sr(1)-O(6)     | 77.33(13)  |
| Sr(1)-O(11)        | 2.612(3)   | O(11)-Sr(1)-O(6)    | 121.34(10) |
| Sr(1)-O(10)        | 2.631(3)   | O(10)-Sr(1)-O(6)    | 89.74(12)  |
| Sr(1)-O(3)#1       | 2.634(3)   | O(3)#1-Sr(1)-O(6)   | 153.08(11) |
| Sr(1)-O(8)         | 2.653(3)   | O(8)-Sr(1)-O(6)     | 80.08(12)  |
| Sr(1)-O(6)         | 2.675(3)   | O(4)-Sr(1)-O(5)     | 76.65(10)  |
| Sr(1)-O(5)         | 2.781(3)   | O(9)-Sr(1)-O(5)     | 113.11(12) |
| Sr(1)-O(4)#1       | 2.799(3)   | O(11)-Sr(1)-O(5)    | 75.37(9)   |
| Cu(2)-O(1)#2       | 1.933(3)   | O(10)-Sr(1)-O(5)    | 73.31(12)  |
| Cu(2)-N(1)#2       | 1.978(3)   | O(3)#1-Sr(1)-O(5)   | 150.39(10) |
| Cu(2)-N(1)         | 1.978(3)   | O(8)-Sr(1)-O(5)     | 119.15(11) |
| O(4)-Sr(1)#1       | 2.799(3)   | O(6)-Sr(1)-O(5)     | 45.97(10)  |
| O(3)-Sr(1)#1       | 2.634(3)   | O(4)-Sr(1)-O(4)#1   | 67.10(10)  |
| O(4)-Sr(1)-O(9)    | 141.05(10) | O(9)-Sr(1)-O(4)#1   | 114.68(11) |
| O(4)-Sr(1)-O(11)   | 78.57(9)   | O(11)-Sr(1)-O(4)#1  | 67.95(8)   |
| O(9)-Sr(1)-O(11)   | 139.87(10) | O(10)-Sr(1)-O(4)#1  | 119.05(10) |
| O(4)-Sr(1)-O(10)   | 141.30(11) | O(3)#1-Sr(1)-O(4)#1 | 48.12(8)   |
| O(9)-Sr(1)-O(10)   | 74.56(11)  | O(8)-Sr(1)-O(4)#1   | 79.94(10)  |
| O(11)-Sr(1)-O(10)  | 70.73(10)  | O(6)-Sr(1)-O(4)#1   | 150.46(11) |
| O(4)-Sr(1)-O(3)#1  | 115.14(9)  | O(5)-Sr(1)-O(4)#1   | 132.20(10) |
| O(9)-Sr(1)-O(3)#1  | 75.75(11)  | O(1)#2-Cu(2)-O(1)   | 180        |
| O(11)-Sr(1)-O(3)#1 | 80.47(9)   | O(1)#2-Cu(2)-N(1)#2 | 83.86(12)  |
| O(10)-Sr(1)-O(3)#1 | 82.79(11)  | O(1)-Cu(2)-N(1)#2   | 96.14(12)  |
| O(4)-Sr(1)-O(8)    | 73.88(9)   | O(1)#2-Cu(2)-N(1)   | 96.14(12)  |
| O(9)-Sr(1)-O(8)    | 68.58(10)  | O(1)-Cu(2)-N(1)     | 83.86(12)  |
| O(11)-Sr(1)-O(8)   | 143.88(9)  | N(1)#2-Cu(2)-N(1)   | 180        |
| O(10)-Sr(1)-O(8)   | 143.06(11) | Sr(1)-O(4)-Sr(1)#1  | 112.90(10) |

Symmetry transformations used to generate equivalent atoms:

#1 -x+1,-y+1,-z #2 -x,-y+1,-z

---

**Compound 10**

|              |          |                   |         |
|--------------|----------|-------------------|---------|
| Ba(1)-O(4)#1 | 2.705(8) | O(4)#1-Ba(1)-O(5) | 84.1(2) |
| Ba(1)-O(3)#2 | 2.782(8) | O(3)#2-Ba(1)-O(5) | 70.9(3) |

|                     |           |                     |            |
|---------------------|-----------|---------------------|------------|
| Ba(1)-O(2)          | 2.816(8)  | O(2)-Ba(1)-O(5)     | 131.7(3)   |
| Ba(1)-O(2)#1        | 2.830(8)  | O(2)#1-Ba(1)-O(5)   | 76.1(2)    |
| Ba(1)-O(4)#3        | 2.960(8)  | O(4)#3-Ba(1)-O(5)   | 153.9(2)   |
| Ba(1)-O(3)#3        | 2.968(9)  | O(3)#3-Ba(1)-O(5)   | 133.9(2)   |
| Ba(1)-O(5)          | 3.030(8)  | O(4)#1-Ba(1)-O(6)   | 141.67(18) |
| Ba(1)-O(6)          | 3.165(6)  | O(3)#2-Ba(1)-O(6)   | 69.1(2)    |
| Ba(1)-C(6)#3        | 3.318(11) | O(2)-Ba(1)-O(6)     | 122.31(17) |
| Ba(1)-Cl(1)         | 3.533(8)  | O(2)#1-Ba(1)-O(6)   | 141.3(2)   |
| Cu(1)-O(1)          | 1.942(7)  | O(4)#3-Ba(1)-O(6)   | 110.32(17) |
| Cu(1)-O(1)#4        | 1.942(7)  | O(3)#3-Ba(1)-O(6)   | 67.01(19)  |
| Cu(1)-N(1)          | 2.003(9)  | O(5)-Ba(1)-O(6)     | 81.07(19)  |
| Cu(1)-N(1)#4        | 2.003(9)  | O(4)#1-Ba(1)-C(6)#3 | 88.4(2)    |
| O(6)-Ba(1)#5        | 3.165(6)  | O(3)#2-Ba(1)-C(6)#3 | 79.9(3)    |
| O(2)-Ba(1)#1        | 2.830(8)  | O(2)-Ba(1)-C(6)#3   | 76.9(2)    |
| C(6)-Ba(1)#6        | 3.318(11) | O(2)#1-Ba(1)-C(6)#3 | 125.9(2)   |
| O(4)-Ba(1)#1        | 2.705(8)  | O(4)#3-Ba(1)-C(6)#3 | 22.7(2)    |
| O(4)-Ba(1)#6        | 2.960(8)  | O(3)#3-Ba(1)-C(6)#3 | 21.8(2)    |
| O(3)-Ba(1)#2        | 2.782(8)  | O(5)-Ba(1)-C(6)#3   | 150.8(2)   |
| O(3)-Ba(1)#6        | 2.968(9)  | O(6)-Ba(1)-C(6)#3   | 87.7(2)    |
| Cl(1)-Ba(1)#1       | 3.533(8)  | O(4)#1-Ba(1)-Cl(1)  | 125.53(19) |
| O(4)#1-Ba(1)-O(3)#2 | 72.6(2)   | O(3)#2-Ba(1)-Cl(1)  | 146.9(2)   |
| O(4)#1-Ba(1)-O(2)   | 93.7(2)   | O(2)-Ba(1)-Cl(1)    | 59.4(2)    |
| O(3)#2-Ba(1)-O(2)   | 153.3(3)  | O(2)#1-Ba(1)-Cl(1)  | 59.34(19)  |
| O(4)#1-Ba(1)-O(2)#1 | 66.2(2)   | O(4)#3-Ba(1)-Cl(1)  | 119.96(16) |
| O(3)#2-Ba(1)-O(2)#1 | 129.0(2)  | O(3)#3-Ba(1)-Cl(1)  | 125.6(2)   |
| O(2)-Ba(1)-O(2)#1   | 59.4(3)   | O(5)-Ba(1)-Cl(1)    | 82.97(19)  |
| O(4)#1-Ba(1)-O(4)#3 | 72.5(2)   | O(6)-Ba(1)-Cl(1)    | 87.41(17)  |
| O(3)#2-Ba(1)-O(4)#3 | 90.7(3)   | C(6)#3-Ba(1)-Cl(1)  | 123.60(17) |
| O(2)-Ba(1)-O(4)#3   | 63.0(2)   | O(1)-Cu(1)-O(1)#4   | 180        |
| O(2)#1-Ba(1)-O(4)#3 | 103.7(2)  | O(1)-Cu(1)-N(1)     | 83.2(3)    |
| O(4)#1-Ba(1)-O(3)#3 | 100.6(3)  | O(1)#4-Cu(1)-N(1)   | 96.8(3)    |
| O(3)#2-Ba(1)-O(3)#3 | 67.1(3)   | O(1)-Cu(1)-N(1)#4   | 96.8(3)    |
| O(2)-Ba(1)-O(3)#3   | 94.1(2)   | O(1)#4-Cu(1)-N(1)#4 | 83.2(3)    |
| O(2)#1-Ba(1)-O(3)#3 | 147.6(2)  | N(1)-Cu(1)-N(1)#4   | 180        |
| O(4)#3-Ba(1)-O(3)#3 | 44.3(2)   |                     |            |

Symmetry transformations used to generate equivalent atoms:

#1 -x+1,y,-z+1/2 #2 -x+1,-y+1,-z+1 #3 x,-y+1,z+1/2 #4 -x+3/2,-y+3/2,-z+1 #5 -x+1,y,-z+3/2 #6 x,-y+1,z-1/2

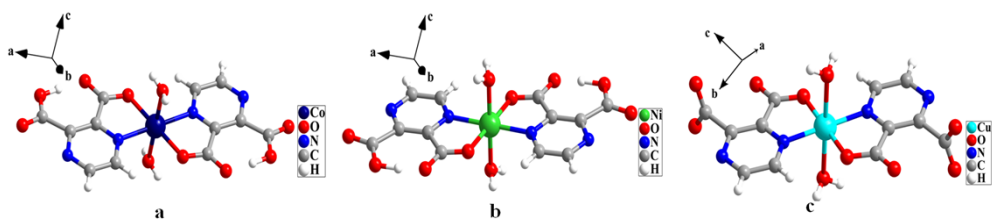

Fig. S1 The coordination environments of  $L_{Co}$  (a),  $L_{Ni}$  (b) and  $L_{Cu}$  (c), respectively.

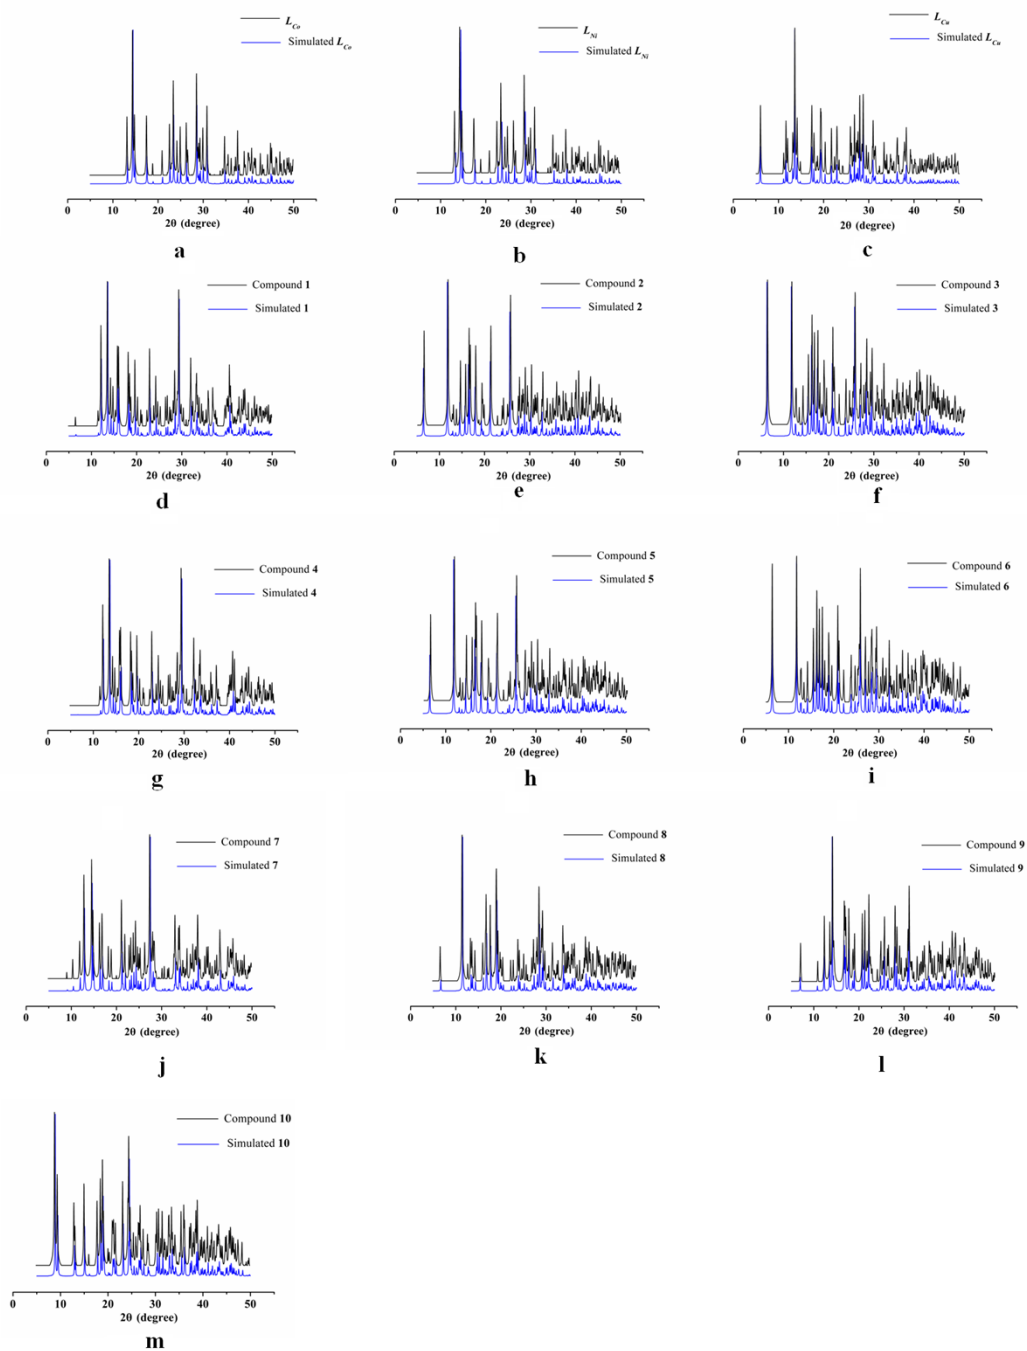

Fig. S2 The XRPD patterns for  $L_{Co}$ ,  $L_{Cu}$ ,  $L_{Ni}$  and 1-10 in a-m respectively.

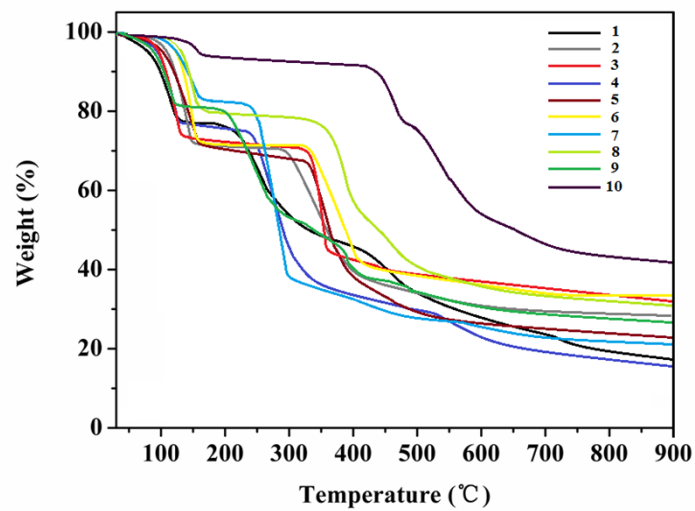

Fig. S3 The TGA curves of complexes 1-10.

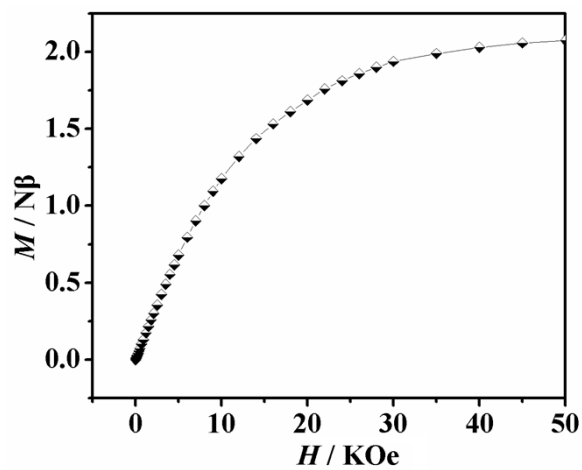

Fig. S4 Magnetization vs  $H$  plot for compound 1.

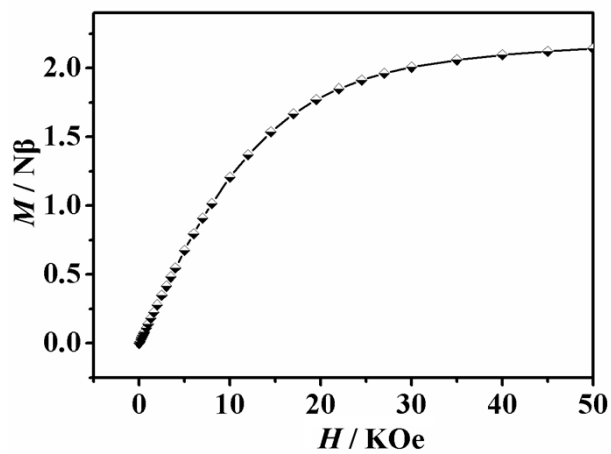

Fig. S5 Magnetization vs  $H$  plot for compound 2.

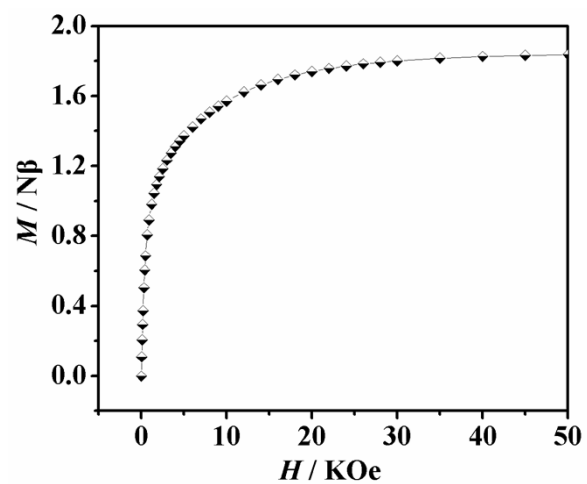

Fig. S6 Magnetization vs  $H$  plot for compound 4.

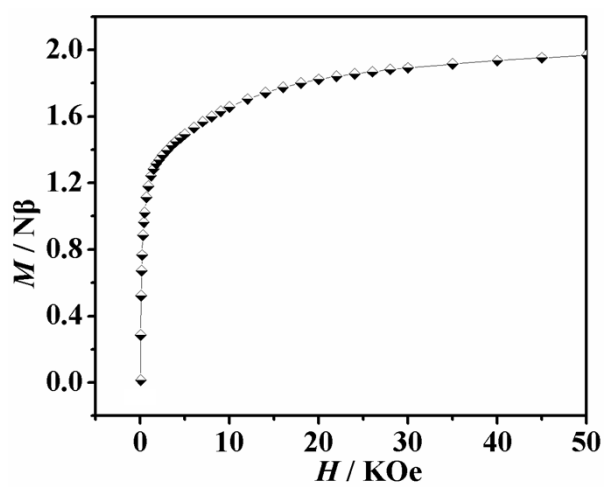

Fig. S7 Magnetization vs  $H$  plot for compound 5.

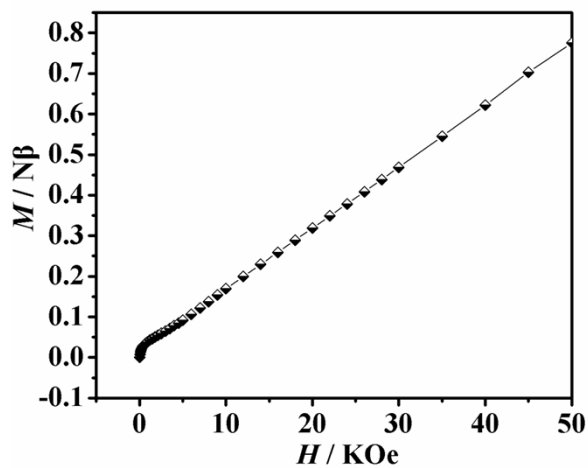

Fig. S8 Magnetization vs  $H$  plot for compound 10.
